# Supplementary material
Source: PubMed Central journal article supplement (PMC9857018)
Supplement: jamaneurol-e224699-s001.pdf [file jamaneurol-e224699-s001.pdf]

## Supplemental Online Content

Belete D, Jacobs BM, Simonet C, et al. Association between antiepileptic drugs and incident Parkinson disease in the UK Biobank. *JAMA Neurol*. Published online December 27, 2022. doi:10.1001/jamaneurol.2022.4699

**eTable 1.** Medication Search Terms

**eTable 2.** Frequency of Cases Prescribed an Antiepileptic Drug

**eTable 3.** Demographics of Cases and Controls

**eTable 4.** Frequency of Prescribed Medications

**eTable 5.** Odds Ratios of Antiepileptic Drugs for Parkinson's Disease in Model Adjusting for Epilepsy Diagnosis

**eTable 6.** Sensitivity Analysis Excluding Prescriptions Issued 1, 2 and 5 Years Before Parkinson's Disease Diagnosis

**eTable 7.** Sensitivity Analysis With Parkinson's Disease Defined as Hospital Episode Statistic and Two or More Prescriptions for Parkinson's Disease Medications

This supplemental material has been provided by the authors to give readers additional information about their work.

eTable 1: Medication Search Terms

| <b>Code</b> | <b>AED Search term</b>           |
|-------------|----------------------------------|
| Read V2     | dnb*                             |
| Drug name   | sodium valproate                 |
| Drug name   | epilim                           |
| Drug name   | Epilim                           |
| Drug name   | EPILIM                           |
| Read V2     | dn3*                             |
| Drug name   | carbamazepine                    |
| Drug name   | Carbamazepine                    |
| Drug name   | CARBAMAZEPINE                    |
| Drug name   | tegretol                         |
| Drug name   | Tegretol                         |
| Drug name   | TEGRETOL                         |
| Read V2     | dno*                             |
| Drug name   | levetiracetam                    |
| Drug name   | Levetiracetam                    |
| Drug name   | LEVETIRACETAM                    |
| Drug name   | keppra                           |
| Drug name   | Keppra                           |
| Drug name   | KEPPRA                           |
| Read V2     | dnf*                             |
| Drug name   | lamotrigine                      |
| Drug name   | Lamotrigine                      |
| Drug name   | lamictal                         |
| Drug name   | Lamictal                         |
| Drug name   | LAMICTAL                         |
| <b>Code</b> | <b>PD medication search term</b> |
| Drug name   | careldopa                        |
| Drug name   | Careldopa                        |
| Drug name   | CARELDOPA                        |
| Drug name   | beneldopa                        |
| Drug name   | Beneldopa                        |
| Drug name   | BENELDOPA                        |
| Drug name   | madopar                          |
| Drug name   | Madopar                          |
| Drug name   | MADOPAR                          |
| Drug name   | Sinemet                          |
| Drug name   | SINEMET                          |
| Read code   | dq2*                             |
| Read code   | dq3*                             |
| BNF code    | 04.09.01.01.00                   |

|           |                |
|-----------|----------------|
| Drug name | entacapone     |
| Drug name | Entacapone     |
| Drug name | ENTACAPONE     |
| Drug name | rotigotine     |
| Drug name | Rotigotine     |
| Drug name | ROTIGOTINE     |
| Drug name | eldepryl       |
| Drug name | Eldepryl       |
| Drug name | ELDEPRYL       |
| Drug name | selegiline     |
| Drug name | Selegiline     |
| Drug name | SELEGILINE     |
| Drug name | pramipexole    |
| Drug name | Pramipexole    |
| Drug name | PRAMIPEXOLE    |
| Drug name | ropinirole     |
| Drug name | Ropinirole     |
| Drug name | ROPINIROLE     |
| BNF code  | 04.09.01.02.00 |
| Drug name | stalevo        |
| Drug name | Stalevo        |
| Drug name | STALEVO        |
| Drug name | rasagiline     |
| Drug name | Rasagiline     |
| Drug name | RASAGILINE     |
| Drug name | Azilect        |
| Drug name | Caramet        |
| Drug name | STALEVO        |
| Drug name | Stalevo        |
| Drug name | Sastravi       |
| Drug name | SASTRAVI       |
| Drug name | bromocriptine  |
| Drug name | Bromocriptine  |
| Drug name | BROMOCRIPTINE  |
| Drug name | cabergoline    |
| Drug name | Cabergoline    |
| Drug name | CABERGOLINE    |
| Drug name | Tolcapone      |
| Read code | dqA*           |
| Drug name | ReQuip         |
| Drug name | Amantadine     |

eTable 2: Frequency of Cases Prescribed an Antiepileptic Drug

| <b>Medications</b>                                      | <b>Cases n=1433</b> |
|---------------------------------------------------------|---------------------|
| Carbamazepine                                           | 32 (2.23)           |
| Clobazam                                                | 5 (0.35)            |
| Lacosamide                                              | 2 (0.14)            |
| Lamotrigine                                             | 15 (1.05)           |
| Levetiracetam                                           | 12 (0.84)           |
| Oxcarbazepine                                           | 0 (0)               |
| Phenytoin                                               | 5 (0.35)            |
| Sodium valproate                                        | 30 (2.09)           |
| Zonisamide                                              | 1 (0.07)            |
| Frequency (%) of cases prescribed anti-epileptic drugs. |                     |

eTable 3: Demographics of Cases and Controls

| <b>Demographics</b>                                                                                                             | <b>Cases (n=1433)</b> | <b>Controls (n=8598)</b> |
|---------------------------------------------------------------------------------------------------------------------------------|-----------------------|--------------------------|
| <b>Age at diagnosis</b>                                                                                                         | 71 (65 - 75)          | 71 (65 - 75)             |
| <b>Townsend deprivation index</b>                                                                                               | -2.30 (-3.63 - 0.46)  | -2.31 (-3.63 - 0.46)     |
| <b>Sex</b>                                                                                                                      |                       |                          |
| Male                                                                                                                            | 873 (60.9)            | 5238 (60.9)              |
| Female                                                                                                                          | 560 (39.1)            | 3360 (39.1)              |
| <b>Ethnicity</b>                                                                                                                |                       |                          |
| White                                                                                                                           | 1397 (97.5)           | 8382 (97.5)              |
| Non-white                                                                                                                       | 36 (2.5)              | 216 (2.5)                |
| Demographics of cases and controls. Continuous variables are expressed medians (inter-quartile range) and categorical as n (%). |                       |                          |

eTable 4: Frequency of Prescribed Medications

| <b>Medications</b>                                                                                | <b>Cases n=1433</b> | <b>Controls n=8598</b> |
|---------------------------------------------------------------------------------------------------|---------------------|------------------------|
| Any AEDs                                                                                          | 62 (4.33)           | 211 (2.45)             |
| Carbamazepine                                                                                     | 32 (2.23)           | 135 (1.57)             |
| Lamotrigine                                                                                       | 15 (1.05)           | 32 (0.37)              |
| Levetiracetam                                                                                     | 12 (0.84)           | 24 (0.28)              |
| Sodium valproate                                                                                  | 30 (2.09)           | 48 (0.56)              |
| Frequency (%) of prescribed medications in the primary case control set. AED: antiepileptic drug. |                     |                        |

eTable 5: Odds ratios of Antiepileptic Drugs for Parkinson's Disease in Model Adjusting for Epilepsy Diagnosis

| <b>Medications</b>                                                                                                                                                                                                                                         | <b>Cases</b> | <b>Controls</b> | <b>OR</b> | <b>Lower 95% CI</b> | <b>Upper 95% CI</b> |
|------------------------------------------------------------------------------------------------------------------------------------------------------------------------------------------------------------------------------------------------------------|--------------|-----------------|-----------|---------------------|---------------------|
| Any AEDs                                                                                                                                                                                                                                                   | 62           | 211             | 1.21      | 0.87                | 1.68                |
| Carbamazepine                                                                                                                                                                                                                                              | 32           | 135             | 1.06      | 0.70                | 1.60                |
| Lamotrigine                                                                                                                                                                                                                                                | 15           | 32              | 1.45      | 0.74                | 2.83                |
| Levetiracetam                                                                                                                                                                                                                                              | 12           | 24              | 1.55      | 0.74                | 3.28                |
| Sodium valproate                                                                                                                                                                                                                                           | 30           | 48              | 2.28      | 1.38                | 3.79                |
| Multivariable logistic model for Parkinson's disease with OR and 95% CI adjusted for age, sex, Townsend deprivation index and HES epilepsy diagnosis. Cases n = 1433. Controls n = 8598. OR: odds ratio. CI: confidence interval. AED: antiepileptic drug. |              |                 |           |                     |                     |

eTable 6: Sensitivity Analysis Excluding Prescriptions Issued 1, 2 and 5 Years Before Parkinson's Disease Diagnosis

| <b>Medications</b>                                                                                                                                                                                                                 | <b>Cases</b> | <b>Controls</b> | <b>OR</b> | <b>Lower 95% CI</b> | <b>Upper 95% CI</b> |
|------------------------------------------------------------------------------------------------------------------------------------------------------------------------------------------------------------------------------------|--------------|-----------------|-----------|---------------------|---------------------|
| <b>1 year</b>                                                                                                                                                                                                                      |              |                 |           |                     |                     |
| Any AEDs                                                                                                                                                                                                                           | 60           | 201             | 1.83      | 1.36                | 2.45                |
| Carbamazepine                                                                                                                                                                                                                      | 32           | 130             | 1.49      | 1.01                | 2.20                |
| Lamotrigine                                                                                                                                                                                                                        | 14           | 30              | 2.82      | 1.49                | 5.33                |
| Levetiracetam                                                                                                                                                                                                                      | 12           | 22              | 3.29      | 1.63                | 6.67                |
| Sodium valproate                                                                                                                                                                                                                   | 29           | 45              | 3.93      | 2.46                | 6.29                |
| <b>2 years</b>                                                                                                                                                                                                                     |              |                 |           |                     |                     |
| Any AEDs                                                                                                                                                                                                                           | 52           | 186             | 1.70      | 1.25                | 2.33                |
| Carbamazepine                                                                                                                                                                                                                      | 28           | 120             | 1.41      | 0.93                | 2.13                |
| Lamotrigine                                                                                                                                                                                                                        | 14           | 29              | 2.92      | 1.54                | 5.53                |
| Levetiracetam                                                                                                                                                                                                                      | 9            | 20              | 2.71      | 1.23                | 5.97                |
| Sodium valproate                                                                                                                                                                                                                   | 26           | 43              | 3.68      | 2.25                | 6.01                |
| <b>5 years</b>                                                                                                                                                                                                                     |              |                 |           |                     |                     |
| Any AEDs                                                                                                                                                                                                                           | 46           | 156             | 1.79      | 1.29                | 2.51                |
| Carbamazepine                                                                                                                                                                                                                      | 25           | 106             | 1.42      | 0.92                | 2.21                |
| Lamotrigine                                                                                                                                                                                                                        | 12           | 22              | 3.29      | 1.63                | 6.67                |
| Levetiracetam                                                                                                                                                                                                                      | 6            | 11              | 3.28      | 1.21                | 8.89                |
| Sodium valproate                                                                                                                                                                                                                   | 24           | 37              | 3.94      | 2.35                | 6.61                |
| Multivariable logistic model for Parkinson's disease with OR and 95% CI adjusted for age, sex and Townsend deprivation index. Cases n = 1433. Controls n = 8598. OR: odds ratio. CI: confidence interval. AED: antiepileptic drug. |              |                 |           |                     |                     |



eTable 7: Sensitivity Analysis With Parkinson’s Disease Defined as Hospital Episode Statistic and Two or More Prescriptions for Parkinson’s Disease Medications

| <b>Medications</b>                                                                                                                                                                                                                | <b>Cases</b> | <b>Controls</b> | <b>OR</b> | <b>Lower 95% CI</b> | <b>Upper 95% CI</b> |
|-----------------------------------------------------------------------------------------------------------------------------------------------------------------------------------------------------------------------------------|--------------|-----------------|-----------|---------------------|---------------------|
| Any AEDs                                                                                                                                                                                                                          | 29           | 130             | 1.35      | 0.90                | 2.03                |
| Carbamazepine                                                                                                                                                                                                                     | 16           | 84              | 1.14      | 0.67                | 1.96                |
| Lamotrigine                                                                                                                                                                                                                       | 4            | 16              | 1.51      | 0.50                | 4.52                |
| Levetiracetam                                                                                                                                                                                                                     | 5            | 19              | 1.58      | 0.59                | 4.25                |
| Sodium valproate                                                                                                                                                                                                                  | 14           | 29              | 2.94      | 1.55                | 5.58                |
| Multivariable logistic model for Parkinson’s disease with OR and 95% CI adjusted for age, sex and Townsend deprivation index. Cases n = 913. Controls n = 5478. OR: odds ratio. CI: confidence interval. AED: antiepileptic drug. |              |                 |           |                     |                     |
